# Supplementary material
Source: HighWire-hosted journal article supplement (https://ijgc.bmj.com/content/ijgc-2022-004039)
Supplement: inline-supplementary-material-1 [file inline-supplementary-material-1.pdf]

1 **Refining Adjuvant treatment IN endometrial cancer Based On molecular**  
2 **features: the RAINBO clinical trial program**

3

4 RAINBO research consortium\*

5

6 \* Lists of participants and their affiliations appear at the end of the paper.

7

8 **Supplemental data**

9

| 10 | <b>Chapter</b>                                             | <b>Page</b> |
|----|------------------------------------------------------------|-------------|
| 11 | 1. In- and exclusion criteria                              | 2           |
| 12 | 2. Requirements for surgery, radiotherapy and chemotherapy | 8           |
| 13 | 3. Histopathology and molecular testing                    | 12          |
| 14 | 4. Sample size and power                                   | 17          |
| 15 | 5. Statistical methods                                     | 21          |
| 16 | 6. RAINBO Research Consortium                              | 23          |
| 17 | 7. Supplemental references                                 | 25          |

18 **1. In- and exclusion criteria**

19 *The p53abn-RED trial*

20 Inclusion criteria:

- 21 • Molecular classification: p53 abnormal (p53abn) endometrial cancer (EC).
- 22 • Histologically confirmed Stage III EC or stage II EC with substantial lymph vascular space invasion
- 23 (LVS1).
- 24 • World Health Organization (WHO) performance score 0-1.
- 25 • Body weight > 30 kg.
- 26 • Adequate systemic organ function:
- 27 ○ Creatinine clearance (> 40 cc/min): Measured creatinine clearance (CL) >40 mL/min or
- 28 Calculated creatinine CL>40 mL/min by the Cockcroft-Gault formula (Cockcroft and Gault
- 29 1976) or by 24-hour urine collection for determination of creatinine clearance.
- 30 • Adequate bone marrow function: hemoglobin >9.0 g/dl, absolute neutrophil count  $\geq 1.0 \times 10^9/l$ ,
- 31 platelet count  $\geq 75 \times 10^9/l$ .
- 32 • Adequate liver function:
- 33 ○ bilirubin  $\leq 1.5 \times$  institutional upper limit of normal (ULN). This will not apply to patients with
- 34 confirmed Gilbert's syndrome (persistent or recurrent hyperbilirubinemia that is
- 35 predominantly unconjugated in the absence of hemolysis or hepatic pathology), who will be
- 36 allowed only in consultation with their physician.
- 37 ○ ALT (serum glutamic-pyruvic transaminase) and/or AST (serum glutamic-oxaloacetic
- 38 transaminase)  $\leq 2.5 \times$  ULN.

39

40 Exclusion criteria:

- 41 • Pathogenic polymerase- $\epsilon$  mutations (*POLE*mut).
- 42 • Mismatch-repair deficiency (MMRd)
- 43 • Major surgical procedure (as defined by the investigator) within 28 days prior to the first dose of
- 44 the investigational medicinal product.
- 45 • History of allogenic organ transplantation.
- 46 • Uncontrolled intercurrent illness, including but not limited to, ongoing or active infection,
- 47 symptomatic congestive heart failure, uncontrolled hypertension, unstable angina pectoris,
- 48 cardiac arrhythmia, interstitial lung disease, serious chronic gastrointestinal conditions associated
- 49 with diarrhea, or psychiatric illness/social situations that would limit compliance with study
- 50 requirement, substantially increase risk of incurring adverse events or compromise the ability of
- 51 the patient to give written informed consent.

- 52 • Any previous treatment with a PARP inhibitor, including olaparib.
- 53 • History of active primary immunodeficiency.
- 54 • History or evidence of hemorrhagic disorders within 6 months prior to randomization
- 55 • Patients with myelodysplastic syndrome/acute myeloid leukemia history or with features
- 56 suggestive of myelodysplastic syndrome/acute myeloid leukemia.
- 57 • Previous allogenic bone marrow transplant or double umbilical cord blood transplantation.
- 58 • Active infection including tuberculosis (clinical evaluation that includes clinical history, physical
- 59 examination and radiographic findings, and tuberculosis testing in line with local practice),
- 60 hepatitis B (known positive Hepatitis B Virus [HBV] surface antigen (HBsAg) result), hepatitis C, or
- 61 human immuno-deficiency virus (positive HIV 1/2 antibodies). Patients with a past or resolved
- 62 HBV infection (defined as the presence of hepatitis B core antibody [anti-HBc] and absence of
- 63 HBsAg) are eligible. Patients positive for hepatitis C (HCV) antibody are eligible only if polymerase
- 64 chain reaction is negative for HCV RNA.
- 65 • Concomitant use of known strong CYP3A inhibitors (e.g., itraconazole, telithromycin,
- 66 clarithromycin, protease inhibitors boosted with ritonavir or cobicistat, indinavir, saquinavir,
- 67 nelfinavir, boceprevir, telaprevir) or moderate CYP3A inhibitors (e.g., ciprofloxacin, erythromycin,
- 68 diltiazem, fluconazole, verapamil). The required washout period prior to starting olaparib is 2
- 69 weeks.
- 70 • Concomitant use of known strong (e.g., phenobarbital, enzalutamide, phenytoin, rifampicin,
- 71 rifabutin, rifapentine, carbamazepine, nevirapine and St John's wort) or moderate CYP3A
- 72 inducers (e.g., bosentan, efavirenz, modafinil). The required washout period prior to starting
- 73 olaparib is 5 weeks for enzalutamide or phenobarbital and 3 weeks for other agents.
- 74 • Patients unable to swallow orally administered medication and patients with gastrointestinal
- 75 disorders likely to interfere with absorption of the study medication.
- 76 • A medical or psychological condition which, in the opinion of the investigator, would not permit
- 77 the patient to complete the study or sign meaningful informed consent.

78

79 *The MMRd-GREEN trial*

## 80 Inclusion criteria:

- 81 • Molecular classification: MMRd EC.
- 82 • Histologically confirmed stage III EC or stage II EC with substantial LVSI.
- 83 • WHO performance score 0-1.
- 84 • Body weight > 30 kg.
- 85 • Adequate systemic organ function:

- 86      ○ Creatinine clearance (> 40 cc/min): measured creatinine clearance (CL) >40 mL/min or
- 87      ○ Calculated creatinine CL>40 mL/min by the Cockcroft-Gault formula (Cockcroft and Gault
- 88          1976) or by 24-hour urine collection for determination of creatinine clearance.
- 89      ● Adequate bone marrow function: hemoglobin >9.0 g/dl. Absolute neutrophil count >1.0 X 10<sup>9</sup>/L,
- 90          platelet count >75 x 10<sup>9</sup>/L.
- 91      ● Adequate liver function:
- 92          ○ Bilirubin <1.5 x Institutional upper limit of normal (ULN). «This will not apply to patients with
- 93              confirmed Gilbert's syndrome (persistent or recurrent hyperbilirubinemia that is
- 94              predominantly unconjugated in the absence of hemolysis or hepatic pathology), who will be
- 95              allowed only in consultation with their physician.
- 96          ○ ALT (serum glutamic-pyruvic transaminase) and/or AST (serum glutamic-oxaloacetic
- 97              transaminase) <2.5 x ULN.
- 98
- 99      Exclusion criteria
- 100      ● Pathogenic *POLE* mutations
- 101      ● Major surgical procedure (as defined by the investigator) within 28 days prior to the first dose
- 102          of the investigational medicinal product.
- 103      ● History of allogenic organ transplantation.
- 104      ● Uncontrolled intercurrent illness, including but not limited to, ongoing or active infection,
- 105          symptomatic congestive heart failure, uncontrolled hypertension, unstable angina pectoris,
- 106          cardiac arrhythmia, interstitial lung disease, serious chronic gastrointestinal conditions
- 107          associated with diarrhea, or psychiatric illness or social situations that would limit compliance
- 108          with study requirement, substantially increase risk of incurring AEs or compromise the ability of
- 109          the patient to give written informed consent.
- 110      ● Any previous treatment with a PD(L)1 inhibitor, including durvalumab.
- 111      ● Receipt of live attenuated vaccine within 30 days prior to the first dose of durvalumab. Note:
- 112          patients, if enrolled, should not receive a live vaccine whilst receiving the investigational
- 113          medicinal product or up to 30 days after the last dose of the investigational medicinal product.
- 114      ● Current or prior use of immunosuppressive medication within 14 days before the first dose of
- 115          durvalumab with the exceptions of:
- 116          ○ Intranasal, inhaled, topical steroids, or local steroid injections (e.g., intra articular injection).
- 117          ○ Systemic corticosteroids at physiologic doses not to exceed «10 mg/day» of prednisone or its
- 118              equivalent.
- 119          ○ Steroids as premedication for hypersensitivity reactions (e.g., CT scan premedication).

- 120 • History of active primary immunodeficiency.
- 121 • Active or prior documented autoimmune or inflammatory disorders (including inflammatory
- 122 bowel disease [e.g., colitis or Crohn's disease], diverticulitis [except for diverticulosis], systemic
- 123 lupus erythematosus, Sarcoidosis, or Wegener syndrome. The following are exceptions to this
- 124 criterion:
- 125 ○ Patients with vitiligo or alopecia.
- 126 ○ Patients with hypothyroidism (e.g., following Hashimoto's thyroiditis) stable on hormone
- 127 replacement.
- 128 ○ Any chronic skin condition that does not require systemic therapy.
- 129 ○ Patients without active disease in the last 5 years may be included but only after
- 130 consultation with the study physician.
- 131 • Active infection including tuberculosis (clinical evaluation that includes clinical history, physical
- 132 examination and radiographic findings, and tuberculosis testing in line with local practice),
- 133 hepatitis B (known positive HBV surface antigen (HBsAg) result), hepatitis C, or human immuno-
- 134 deficiency virus (positive HIV 1/2 antibodies). Patients with a past or resolved HBV infection
- 135 (defined as the presence of hepatitis B core antibody [anti-HBc] and absence of HBsAg) are
- 136 eligible. Patients positive for hepatitis C (HCV) antibody are eligible only if polymerase chain
- 137 reaction is negative for HCV RNA.
- 138 • A medical or psychological condition which, in the opinion of the investigator, would not permit
- 139 the patient to complete the study or sign meaningful informed consent.

140

141 *The NSMP-ORANGE trial*

## 142 Inclusion criteria

- 143 • Non-specific molecular profile (NSMP) EC.
- 144 • Histologically confirmed stage II EC with substantial LVSI or stage III EC.
- 145 • Estrogen receptor (ER) positive EC.

146

## 147 Exclusion criteria

- 148 • Pathogenic *POLE* mutations
- 149 • Mismatch-repair deficiency
- 150 • p53 abnormality (IHC or sequencing of the entire *TP53* gene)

151

152

153 *The POLEmut-BLUE trial*

## 154 Inclusion criteria

- 155 • Pathogenic *POLE* mutation(s).
- 156 • For the low-risk group, patients must have one of the following combinations of FIGO stage,  
157 grade, and LVSI:
  - 158 ○ Stage IA (not confined to polyp), grade 3, pN0\*, with or without LVSI.
  - 159 ○ Stage IB, grade 1 or 2, pNx/N0, with or without LVSI.
  - 160 ○ Stage IB, grade 3, pN0\*, without substantial LVSI^.
  - 161 ○ Stage II (microscopic), grade 1 or 2, pN0\*, without substantial LVSI.
- 162 • For the higher-risk group, patients must have one of the following combinations of FIGO stage,  
163 grade, and LVSI:
  - 164 ○ Stage IA (not confined to polyp), grade 3, pNx, with or without LVSI
  - 165 ○ Stage IB, grade 3, pNx, with or with LVSI.
  - 166 ○ Stage IB, grade 3, pN0, with substantial LVSI^.
  - 167 ○ Stage II (microscopic), grade 1 or 2, pNx, with or without LVSI.
  - 168 ○ Stage II (microscopic), grade 1 or 2, pN0, with substantial LVSI^.
  - 169 ○ Stage II (microscopic), grade 3, pNx/N0, with or without LVSI.
  - 170 ○ Stage II non-microscopic, any grade, pNx/N0, with or without LVSI.
  - 171 ○ Stage III, any grade, pNx/N0-2, with or without LVSI.
- 172 • Patient consent must be appropriately obtained in accordance with applicable local and  
173 regulatory requirements. Each patient must sign a consent form prior to enrolment in the trial  
174 to document their willingness to participate. A similar process must be followed for sites  
175 outside of Canada as per their respective cooperative group's procedures.
- 176 • Patient is able (i.e., sufficiently fluent) and willing to complete the QOL and/or health utility  
177 questionnaires in either English, French or a validated language. The baseline assessment must  
178 be completed within the required timelines, prior to enrolment. Inability (lack of  
179 comprehension in English or French, or other equivalent reason such as cognitive issues or lack  
180 of competency) to complete the questionnaires will not make the patient ineligible for the  
181 study. However, ability but unwillingness to complete the questionnaires will make the patient  
182 ineligible.
- 183 • Patients must be accessible for treatment and follow up. Patients enrolled on this trial must be  
184 treated and followed at the participating center. Investigators must assure themselves the  
185 patients enrolled on this trial will be available for complete documentation of the treatment,  
186 adverse events, and follow-up.

- 187 • Patients must agree to return to their primary care facility for any adverse events which may  
188 occur through the course of the trial.
- 189 • In accordance with CCTG policy, protocol treatment is to begin within 10 weeks of  
190 hysterectomy/bilateral salpingo-oophorectomy.
- 191
- 192 \* Pelvic lymph node surgical assessment (sentinel or full lymphadenectomy) is required for grade 3  
193 or stage II. Para-aortic lymphadenectomy is not mandated.
- 194 ^ Substantial LVSI is defined as  $\geq 3$  foci as per College of American Pathologists' reporting guidelines.  
195
- 196 Exclusion criteria
- 197 • Prior chemotherapy for EC
- 198 • Isolated tumor cells identified in lymph node(s) for the low risk group
- 199

## 200 **2. Requirements for surgery, radiotherapy and chemotherapy**

201

202 The RAINBO program imposes some requirements on participating centers for surgery,  
203 external beam radiotherapy and/or vaginal brachytherapy and chemotherapy if these treatments  
204 are given in the four clinical trials.

### 205 *Surgery*

206 The standard surgical procedure is i) open, ii) laparoscopic, or iii) robot-assisted total  
207 abdominal hysterectomy with bilateral salpingo-oophorectomy (BSO) and biopsy of any clinically  
208 suspicious lesions (such as peritoneal deposits or lymph nodes) with histological examination.  
209 Performance of diagnostic staging lymphadenectomy and/or sentinel node biopsy are at the  
210 discretion of the participating center or group.

211 Lymph node debulking with or without para-aortic lymph node sampling is recommended in  
212 case of macroscopic positive pelvic nodes and/or para-aortic nodes, as detected on pre-surgical CT  
213 or MRI scans or intra-operatively. Other extra-uterine tumor deposits should also be completely  
214 removed.

215 At the completion of the operation there should be no remaining macroscopic tumor.

216

### 217 *External beam radiotherapy*

218 The dose schedule for adjuvant EBRT should range between 45-48.6 Gy, with fraction size of  
219 1.8-2.0 Gy per fraction, 5 fractions a week. Treatment should preferably be started within 6 to 8  
220 weeks after surgery, but no later than 10 weeks. Treatment breaks should be avoided, and  
221 treatment time for EBRT should be kept within 5-6 weeks. Treatment prolongation due to public  
222 holidays and machine maintenance should not exceed 2-4 days.

223 External beam radiotherapy will be given according to the center's standard policy and  
224 technique. Pelvic or pelvic and para-aortic radiotherapy is used according to the extent of the tumor  
225 involvement. The clinical target volume (CTV) includes the proximal half of the vagina, the  
226 paravaginal / parametrial soft tissues, and the internal and external iliac lymph node regions, as well  
227 as the distal third to half of the common iliac lymph node region. Inclusion of the subaortic pre-  
228 sacral nodes is recommended for tumors with pelvic lymph node involvement, cervical stromal  
229 involvement, or vaginal involvement.

230 Contouring of the CTV should be done according to literature data and atlases and taking  
231 institutional preferences and practices into account. Useful guidelines and contouring atlas can be  
232 found at: RTOG website (NRG Oncology/RTOG consensus guidelines), and in the publication by



233 Small.<sup>1</sup> The organs at risk to be contoured are the bladder, rectum, sigmoid, bowel bag (excluding  
234 sigmoid, according to the EMBRACE-II recommendations), and the femoral heads.<sup>2</sup>

235 In case of external or internal iliac lymph node involvement, the common iliac lymph node  
236 regions are to be included up to the aortic bifurcation. In case of common iliac node involvement,  
237 the target volume should include at least the lower para-aortic region. In case of para-aortic  
238 involvement, the para-aortic lymph node region should be extended to include the higher para-  
239 aortic region at least 1 cm above the renal vessels (margin of at least 2 cm above the highest lymph  
240 node region involved).<sup>1</sup> If a complete bilateral lymphadenectomy has been performed with at least  
241 12 lymph nodes (with nodes from all sites: left and right external, internal and common iliac regions  
242 and lower para-aortic nodes) and all lymph nodes are free of tumor at histopathologic evaluation,  
243 the upper border of the CTV is at the start of the (common) iliac bifurcation.

244 CT planning will be used with individual target volume and organ-at-risk contouring for all  
245 patients. Treatment planning will be done using intensity-modulated radiotherapy (IMRT) or  
246 volumetric arc therapy (VMAT) or tomotherapy with appropriate QA. CT planning scans in treatment  
247 position with (comfortably) full bladder should be obtained; preferably also an empty bladder scan is  
248 obtained and merged to determine an internal target volume (ITV) accounting for movement of the  
249 vaginal vault region.<sup>1</sup> The full bladder scan should be used for treatment planning. Dose  
250 specification, planning and homogeneity requirements should be done according to ICRU-report 83.<sup>3</sup>  
251 The dose in the CTV, PTV and organs at risk should be recorded and DVHs should be generated. At  
252 least 95% of the prescribed dose should cover >98% of the PTV (aiming for >99%). The maximum  
253 dose received by 2% of the PTV should not exceed 107 % of the prescribed dose. Dose constraints  
254 for the organs at risk are provided below in Supplemental Table 1.

255 The Planning Target Volume (PTV) consists of the CTV/ITV with a 5-7 mm margin, depending  
256 on the type of position verification and institutional practices. Daily position verification using cone  
257 beam CT is strongly recommended. A 'library of plans' technique with daily selection of the most  
258 appropriate treatment plan is permitted if standard for the treating center.

259

260

261 **Supplemental Table 1. RAINBO dose aims and constraints for external beam radiotherapy**

| Organ at risk          | Dose volume | Limit     | Type       |
|------------------------|-------------|-----------|------------|
| Bowel                  |             |           |            |
| - RT pelvic area       | V30Gy       | < 500 cc  | constraint |
| - RT pelvic + PAO area | V30Gy       | < 650 cc  | constraint |
|                        | V30Gy       | < 350 cc  | aim        |
|                        | V40Gy       | < 250 cc  | aim        |
| Sigmoid                | V45Gy       | < 60%     | aim        |
|                        | V50Gy       | < 50%     | aim        |
| Bladder                | V40Gy       | < 75%     | aim        |
|                        | V30Gy       | < 85%     | aim        |
| Rectum                 | V30Gy       | < 95%     | aim        |
|                        | V40Gy       | < 85%     | aim        |
| Spinal canal           | V48Gy       | < 0.03 cc | constraint |
| Femur head             | Dmax        | < 50 Gy   | aim        |
| Kidney                 | Dmean       | < 15 Gy   | constraint |
|                        |             | < 10 Gy   | aim        |
|                        | V12Gy       | < 55%     | constraint |
| Body                   | Dmax        | 107%      | constraint |

262 *Definition of abbreviations: D = dose; PAO = para-aortic; RT = radiotherapy; V = volume*

263

264 *Vaginal brachytherapy*

265 A brachytherapy boost is to be considered in patients with documented cervical stromal  
 266 involvement and/or substantial LVSI. Brachytherapy should be either incorporated within the last  
 267 week of EBRT (not giving both on the same day) or be given in the first week after completion of  
 268 EBRT (HDR sessions ideally immediately following completion of EBRT). Overall treatment time for  
 269 radiotherapy (EBRT and brachytherapy) should not exceed 50 days.

270 Brachytherapy is given with a vaginal cylinder or vaginal ovoids or ring applicator, according  
 271 to the center's standard technique. When using a cylinder, the active length will ideally be 2-3 cm,  
 272 with the reference isodose covering the proximal 2.5-3 cm of the vagina. High-dose-rate (HDR) and  
 273 pulse-dose-rate (PDR) schedules are permitted, which deliver an EQD2 equivalent dose of 10-14 Gy  
 274 at 5 mm from the vaginal mucosa (to obtain a cumulative EDQ2 of 60 Gy at 5 mm). Example of a  
 275 schedule: HDR 8-10 Gy in 2 fractions.

276

277 *Radiotherapy quality control*

278 The participating centers of the RAINBO program have extensive experience with quality  
 279 assessment of external beam radiotherapy and brachytherapy in clinical trials for EC because of the  
 280 proceeding series of PORTEC trials.<sup>4-6</sup> In addition, many centers have participated in the EMBRACE<sup>2,7</sup>

281 and INTERLACE trials (NCT0566240) on cervical cancer which are renowned for their stringent EBRT  
282 and brachytherapy planning criteria and intensive assessments. This protocol is based on those  
283 experiences and provides the participating centers with a detailed description of the requirements  
284 for EBRT and brachytherapy that should fit current practices. Therefore, there will be no formal  
285 radiotherapy quality assessment control in the RAINBO trials.

286

#### 287 *Chemotherapy*

288 Chemotherapy in the RAINBO program is preferably given concurrent and adjuvant  
289 according to the PORTEC-3 schedule: two cycles of intravenous cisplatin 50mg/m<sup>2</sup> in the first and  
290 fourth week of the pelvic external beam radiotherapy followed by four cycles of intravenous  
291 carboplatin AUC 5 and paclitaxel 175 mg/m<sup>2</sup> at 21-day intervals.<sup>6</sup>

292

### 293 **3. Histopathology and molecular testing**

#### 294 *Histopathology*

295 One of the unique aspects of the RAINBO program is that all histological grades and almost  
296 all histological subtypes of endometrial cancer can enter the program. Histologic subtypes that are  
297 eligible for the RAINBO program are: endometrioid (all grades), serous, clear cell, carcinosarcomas,  
298 un-/dedifferentiated endometrial carcinomas and mixed-epithelial carcinomas. Histologic subtypes  
299 that are excluded are: gastric-type endometrial carcinomas and mesonephric-like endometrial  
300 carcinomas. Central histopathological review is not a requirement for entering into the RAINBO  
301 program.

302 Assessment of cervical stromal tumor invasion must be performed by microscopy as part of  
303 the pathological staging of the surgical resection specimen; only cases with unequivocal stromal  
304 involvement should be classified as stage II.

305 Substantial LVSI can be diagnosed on H&E slides without the need for additional  
306 immunostains. Substantial LVSI is defined as widespread invasion of tumor emboli into vascular  
307 spaces at and beyond the invasive front of the tumor. It is most often identified in a spray-like  
308 pattern in the myometrium and frequently accompanied by vascular-associated immune-infiltrate.  
309 Although the extent of LVSI may vary per H&E slide, LVSI foci are often found in multiple slides. If the  
310 extent of LVSI is limited to <4 vessels, it is regarded as focal LVSI. For some of the RAINBO trials at  
311 least substantial LVSI must be present for some tumor stages. Substantial LVSI is defined as LVSI in 4  
312 or more vessels.<sup>8</sup>

313

#### 314 *Molecular classification*

315 Prior to inclusion in one of the RAINBO trials complete assessment of the molecular  
316 classification must be performed on the EC specimen. This can be either the tumor containing  
317 hysterectomy (preferred) specimen or the preoperative specimen. Molecular classification includes  
318 mutational status assessment of the exonuclease domain of DNA polymerase epsilon (*POLE*), MMR  
319 immunohistochemistry (IHC) and p53 IHC or TP53 sequencing. These tests should be performed in a  
320 (pathology) laboratory with ISO-15189 accreditation (or equivalent certification). For molecular class  
321 assignment the algorithm of the WHO 2020 classification is used.<sup>9</sup> Cases with more than one  
322 classifying feature (sometimes referred to as multiple or double classifiers) should be classified as  
323 follows:

324 i) EC with pathogenic *POLE* mutations are classified as *POLE*mut EC regardless of the MMR and  
325 p53 status,

- 326 ii) EC without pathogenic *POLE* mutations and mismatch repair deficiency are classified as MMRd  
 327 EC, regardless of the p53 status,  
 328 iii) EC without pathogenic *POLE* mutations that are mismatch repair proficient and have p53 an  
 329 abnormal IHC pattern and/or pathogenic *TP53* mutations are classified as p53abn EC, and  
 330 iv) EC without pathogenic *POLE* mutations that are mismatch repair proficient and have no p53  
 331 abnormalities are classified as NSMP.

332

333 *POLE* status

334 There is a variety of validated technologies available to assess the status of *POLE* in EC.  
 335 Acceptable technologies for RAINBO include: 1) targeted NGS covering exon 9-14, 2) Sanger  
 336 sequencing covering exon 9-14. Use of other technologies such as *POLE* hotspot analysis by for  
 337 example (multiplex) qPCR or SnAPShot could be granted by the RAINBO steering committee after  
 338 proper validation against golden standard NGS. For all techniques, adequate assessment of  
 339 preferably the mutational status of all 11 hotspots, but at least the five most frequent hotspots  
 340 within the exonuclease domain of *POLE* are required (Table 2.1). *POLE* variants outside the  
 341 exonuclease domain are not considered.

342 **Supplemental table 1. Pathogenic *POLE* EDM mutations in the exonuclease domain**

| Order of frequency | Protein change | Nucleotide substitution | Assessment for RAINBO program | Interpretation molecular class |
|--------------------|----------------|-------------------------|-------------------------------|--------------------------------|
| 1.                 | P286R          | c.857C > G              | Mandatory                     | <i>POLE</i> -mutant            |
| 2.                 | V411L          | c.1231G > T or C        | Mandatory                     | <i>POLE</i> -mutant            |
| 3.                 | S297F          | c.890C > T              | Mandatory                     | <i>POLE</i> -mutant            |
| 4.                 | S459F          | c.1376C > T             | Mandatory                     | <i>POLE</i> -mutant            |
| 5.                 | A456P          | c.1366G > C             | Mandatory                     | <i>POLE</i> -mutant            |
| 6.                 | F367S          | c.1100T > C             | Strongly recommended          | <i>POLE</i> -mutant            |
| 7.                 | L424I          | c.1270C > A             | Strongly recommended          | <i>POLE</i> -mutant            |
| 8.                 | M295R          | c.884T > G              | Strongly recommended          | <i>POLE</i> -mutant            |
| 9.                 | P436R          | c.1307C > G             | Strongly recommended          | <i>POLE</i> -mutant            |
| 10.                | M444K          | c.1331T > A             | Strongly recommended          | <i>POLE</i> -mutant            |
| 11.                | D368Y          | c.1102G > T             | Strongly recommended          | <i>POLE</i> -mutant            |

343 According to León-Castillo et al. J Pathol 2020<sup>10</sup>

344

345 Besides the pathogenic *POLE* mutations in the exonuclease domain listed in Supplemental  
 346 table 1, León-Castillo et al. (J Pathol 2020<sup>10</sup>) also defined a list of non-pathogenic *POLE* mutations  
 347 and variants of unknown significance in the exonuclease domain of *POLE*. These neither affect the  
 348 assessment of the *POLE* status nor assignment of the molecular class. In case of the detection of a  
 349 novel *POLE* variant within the exonuclease domain that is not described by León-Castillo et al. (J  
 350 Pathol, 2020), the case should be regarded as *POLE* wildtype.

351 For the inclusion into the *POLE*mut-BLUE trial, the EC must contain a pathogenic variant in  
352 the exonuclease domain of *POLE*. If the assessment of the *POLE* status has failed or is not available,  
353 the patient cannot enter the RAINBO program. Assignment of an EC as being *POLE*mut EC is  
354 independent of any of the other test results as described in Supplemental figure 1.

355 In the unlikely case that a patient has a pathogenic *POLE* mutation but assessment of MMR  
356 status and/or p53 status has failed, the patient is not eligible for participation in the RAINBO  
357 program either, even though such patients can be classified into the *POLE*mut molecular class  
358 according to the WHO 2020 algorithm.

359

#### 360 *MMR status*

361 For the purpose of all RAINBO trials MMR status must be determined by IHC. When MMR-  
362 IHC is performed, MSH6 and PMS2 (two-antibody approach) is the minimal requirement. Cases with  
363 positive nuclear staining of MSH6 and PMS2 can be regarded MMR proficient. In all cases with  
364 ambiguous MSH6 and/or PMS2 staining, MLH1 and MSH2 are required for final MMR status  
365 assignment. A cancer is considered MMR deficient when at least one of the MMR proteins show loss  
366 of expression with positive internal control. In most MMR deficient cases, the complete tumor will  
367 show loss of expression; infrequently a sub-clonal loss of MMR expression can be observed. In cases  
368 of sub-clonal/partial MMR protein loss there might be a pathogenic driver mutation in *POLE*. If the  
369 EC appears to be *POLE*-wild type, the cancer is considered MMR deficient when >10% of the tumor  
370 volume shows sub-clonal loss.

371 In ambiguous MMR-IHC cases or in case of failed MMR IHC, it is recommended to perform  
372 an analysis of MSI status for definitive assignment. MSI-high is then considered equal to MMRd. If  
373 both tests failed, then MMR status and final molecular class cannot be assigned, and the patient is  
374 not eligible for inclusion in the RAINBO trials. For the assignment of an EC as MMR deficient, *POLE*  
375 status must be wildtype as can be deduced from Supplemental Figure 1.

376 The RAINBO program encourages to execute the Lynch Syndrome triage following  
377 international guidelines.<sup>11</sup> It is therefore recommended to perform MLH1 methylation assay in cases  
378 with loss of MLH1/PMS2 expression in order to pre-screen patients for germline testing. The MLH1  
379 methylation assay is however not a requirement for entering in one of the RAINBO trials, as it has no  
380 impact on the molecular EC classification.

381

#### 382 *p53 status*

383 p53 status is preferably determined by IHC. Abnormal p53 IHC is defined as 1) complete loss  
384 of expression with positive internal control or 2) strong nuclear and/or 3) cytoplasmic

385 overexpression. When the p53-IHC stain is well interpretable, TP53 sequencing is not required for  
386 molecular subgroup assignment. In cases with an ambiguous IHC result, p53 status cannot be  
387 assigned by p53 IHC alone. In these instances, it is recommended to use sequencing (NGS or Sanger)  
388 to assign p53 status. Upfront assessment of p53 status by *TP53* mutational analyses (e.g., by NGS or  
389 Sanger) instead of IHC is allowed under the condition that 1) the complete *TP53* gene is covered by  
390 the sequencing panel and 2) only pathogenic p53 mutations are considered. We refer to the  
391 following two public databases to determine the pathogenicity of any detected TP53 mutations:

- 392 • International Agency for Research on Cancer (IARC) TP53 database<sup>12</sup>  
393 (<https://p53.iarc.fr/TP53GeneVariations.aspx>)
- 394 • ClinVar database<sup>13</sup>  
395 (<https://erepo.clinicalgenome.org/evrepo/ui/classifications?matchMode=exact&gene=TP53>)

396 Sometimes sequencing detects *TP53* mutations that are not present in these two databases.  
397 Often these are secondary mutations in a MMRd or *POLE*mut EC that can be disregarded. If the  
398 tumor is MMR proficient and *POLE* wild type, we recommend performing p53 IHC and rely on the  
399 IHC result to classify the EC.

400 If both IHC and sequencing of the whole TP53 gene are performed upfront, discordance  
401 between these two techniques can be observed in 7.7-9.3% across all EC molecular types and in 4.9-  
402 5.5% in *POLE*-wild type and MMR-proficient EC.<sup>14 15</sup> The majority of these discordant cases can be  
403 resolved by reviewing the p53 IHC (missed sub-clonal areas, missed “null=pattern”?) and reviewing  
404 the sequencing data (is the variant truly pathogenic, has there not been a mix-up, what is the allele-  
405 frequency?). If in such cases IHC shows convincing abnormality and sequencing did not detect a  
406 pathogenic variant, the cases should be considered p53 abnormal. If sequencing shows a pathogenic  
407 *TP53* variant but IHC shows a convincing wild type staining pattern, other aspects can be considered  
408 for final molecular subgroups assignment. One can for example look at the other molecular  
409 alterations (Her2 amplification, PTEN status, histologic subtype) to support a subgroup assignment.  
410 We estimate that this will only be needed in ~1% of cases and we advise to send these specific cases  
411 out for consult to the national RAINBO pathology expert for assistance with the interpretation and  
412 assignment of molecular class.

413 Abnormal p53 patterns may be observed in only a part of the tumor while the remaining  
414 tissue shows wild type p53 staining; this is called sub-clonal abnormal p53 expression and has been  
415 observed in 5-7% of high-risk EC.<sup>14 15</sup> This phenomenon is often the result of secondary p53  
416 mutations and usually occurs in *POLE* mutant or MMRd EC. According to the WHO 2020 guideline,  
417 those cases must be assigned to respectively the *POLE*mut or MMRd EC molecular class. Hence, sub-  
418 clonal p53 abnormality in *POLE*mut and MMRd EC does not affect eligibility for respectively the

419 RAINBO-BLUE and RAINBO-GREEN trials. However, in *POLE*-wild type and MMR proficient EC, the  
420 presence of sub-clonal p53 abnormality will determine whether the EC is classified as a p53abn EC or  
421 a NSMP EC. Because this situation is very rare (<1% of EC) current literature does not provide solid  
422 evidence for a threshold for the percentage of sub-clonal p53 abnormality.<sup>15</sup> For the RAINBO  
423 program, it was decided based on consensus that *POLE*-wild type, MMR-proficient EC with sub-  
424 clonal p53 abnormality in >50% of the tumor should be regarded as p53abn EC and are eligible for  
425 participation in the RAINBO-RED trial. *POLE* wild type, MMR-proficient EC with sub-clonal p53  
426 abnormality in <10% of the tumor should be regarded as NSMP EC and are eligible for participation  
427 in the RAINBO NSMP-ORANGE trial. The very small group of patients who have a *POLE* wild type,  
428 MMR proficient EC with 10-50% sub-clonal p53 abnormality cannot be assigned to a molecular class  
429 and are not eligible for participation in any of the 4 RAINBO clinical trials. Nonetheless, collection of  
430 data on clinical outcome and FFPE tumor blocks of this specific subgroup is encouraged to enable  
431 future research on molecular class assignment.

432 For further details on the interpretation of p53-IHC we refer to the following publications:  
433 Köbel et al. 2016<sup>16</sup>, Singh et al. 2020<sup>14</sup> and Vermij et al. 2022.<sup>15</sup> To finally assign an EC as p53abn EC  
434 the EC must show abnormal p53 expression and be MMR proficient and *POLE* wild type.

435

#### 436 *ER status*

437 ER should be assessed using immunohistochemistry of a whole tumor slide in women who  
438 have NSMP EC (hence *POLE* wild type and MMR proficient and p53 wild type) to determine eligibility  
439 for the NSMP-ORANGE trial. ER is considered positive if expression is observed in >10% of the tumor  
440 tissue. Women with NSMP EC with ER positivity can be considered for inclusion in the RAINBO  
441 NSMP-ORANGE trial.

442

#### 443 *Allocation to molecular class-based trial*

444 EC patients that are eligible based on the in- and exclusion criteria of the RAINBO program  
445 (listed in the main text of the article), and who are molecularly classified as described above should  
446 be considered for inclusion in the RAINBO trial of their molecular type. The patients should be  
447 screened according to the inclusion- and exclusion criteria of the appropriate trial (Supplementary  
448 Data 1) and be counselled and asked for informed consent if eligible.

449



#### 450 **4. Sample size and power**

451

##### 452 *The p53abn-RED trial*

453 The trial has a superiority design wherein eligible patients will be randomized (1:1) to  
454 olaparib (300 mg per day, orally) starting after chemoradiation for a total of 2 years vs.  
455 chemoradiation only. Based on an expected RFS rate of 64.6% at 3 years in control group (PORTEC-  
456 3<sup>17</sup>), 197 events will allow to test for a hazard ratio of at least 0.67 (i.e., RFS rate of 74.6% at 3 years  
457 in treatment group) with a power of 80% or more, based on a 5%-bilateral log rank test, and  
458 including an interim analysis for efficacy. An interim analysis will be performed with group-  
459 sequential design when 70% of the information will be accrued, i.e., after 139 RFS events..  
460 Considering an exponential survival, an accrual duration of 36 months and an additional follow-up  
461 period of 30 months, 526 patients will need to be included overall. Considering a potential dropout  
462 rate of 5%, the number of patients to include is set to 554.

463

##### 464 *The MMRd-GREEN trial*

465 The trial has a superiority design wherein eligible patients will be randomized (1:1) to either  
466 external beam radiotherapy concurrent with the PD-L1 inhibitor durvalumab (AstraZeneca) up to  
467 one year or external beam radiotherapy only. A two-sided log-rank test with an overall sample size  
468 of 309 subjects (154 in the control group and 155 in the experimental group) achieves 80.0% power  
469 at a 0.05 significance level to detect a hazard ratio of 0.58 when the proportion surviving in the  
470 control group is 0.65 and in the experimental group is 0.78. After correction for drop-out, the  
471 required sample size is 316 subjects. Accrual duration is projected to be 30 months with a 30-month  
472 additional follow-up period. No interim analysis is planned, but an independent data monitoring  
473 committee will continuously monitor recurrences and adverse events in the trial.

474

##### 475 *The NSMP-ORANGE trial*

476 The trial has a non-inferiority design wherein eligible patients will be randomized (1:1) to  
477 radiotherapy with hormone therapy (medroxyprogesterone or medroxyprogesterone acetate) for 2  
478 years or chemoradiation. The sample size calculation is based on the stage III NSMP EC patients  
479 participating in the PORTEC-3 trial who had a 3-year RFS of 82.5% after chemoradiation.<sup>17</sup> A non-  
480 inferiority margin of 7.5 percentage points is of interest, to exclude a 3-year RFS rate of below 75%  
481 in the experimental arm, representing a hazard ratio (HR) of 1.495. This margin was chosen after  
482 considering outcomes through RT alone in PORTEC-3 and is in-line with the perspectives of both  
483 patients and clinicians with regards to the required benefits for adjuvant chemotherapy to be

484 worthwhile in EC.<sup>18</sup> Patients will be recruited over 5 years with 3 years of additional follow-up to  
485 observe 153 RFS events, for 80% power at the one-sided 5% significance level after allowing for up  
486 to 5% dropout. As the planned recruitment period is relatively long, futility analyses are  
487 incorporated into the study. Conditional power will be calculated and presented to the independent  
488 data monitoring committee on an annual basis; if this drops below 15% then a further check will be  
489 made after 6 months and if conditional power remains <15% then the IDMC may recommend closing  
490 the trial.<sup>19</sup>

491

#### 492 *The POLEmut-BLUE trial*

493 In the *POLEmut-BLUE* trial eligible patients with select stage I-II *POLEmut* EC in the main  
494 study cohort (see Supplementary Data 1) will receive no adjuvant therapy. Patients will be recruited  
495 over 36 months with 36 months of additional follow-up, which will give an expected total person-  
496 years of 506. Assuming a 3-year pelvic recurrence rate of 1%, the upper 95% confidence limit for the  
497 true 3-year pelvic recurrence rate would be 2.4%; a true 3-year pelvic recurrence rate of 5%, which is  
498 considered an unacceptable high risk, can be ruled out with more than 95% confidence. If the  
499 observed 3-year pelvic recurrence rate is higher at 2%, then the upper 95% confidence limit for the  
500 true 3-year pelvic recurrence rate would be 3.7% and a rate of 5% or higher can still be rejected at  
501 the one-sided 5% significance level. Interim analysis for futility will be carried out when half of the  
502 person-years of follow-up have been observed, corresponding to approximately 253 person-years.  
503 Final analysis will be performed when 506 person-years of follow-up are observed, which is foreseen  
504 at 3 years after the inclusion of the last patient. In addition, higher-risk *POLEmut* EC patients will be  
505 accrued into the exploratory cohort, offering observation or radiation alone (estimated sample size  
506 25) for descriptive analysis.

507

#### 508 *RAINBO overarching research program*

509 In the overarching *RAINBO* research program, predefined comparisons between  
510 personalized molecular profile-based treatment and standard treatment will be made including all  
511 participants of the four *RAINBO* sub-trials. To determine whether personalized treatment for EC is  
512 more effective, less toxic and provides a better QoL than standard treatment, all patients who have  
513 received molecular profile-directed adjuvant treatment (Group A) will be pooled and compared to  
514 the pooled data of all patients who have received standard treatment (Group B). The projected  
515 sample size of the overarching research program is around 1600. Power calculations for the different  
516 endpoints were based on a sample size of 700 cases per group.

517

518 Treatment efficacy

519 It is estimated that we will have 80% power (alpha 0.01) to detect a true hazard ratio of  
520 0.833 or 1.201 based on 700 participants in each group; and 90% power to detect a true HR of .814  
521 or 1.229. Assumptions: accrual time of 4 years, additional follow-up time of 3 years and a median  
522 RFS with the standard treatment of 5.04 years (based on the PORTEC-3 trials' pooled estimate). The  
523 relation between the power and detectable difference is presented in power graph 1 of  
524 Supplemental figure 2.

525

526 Treatment toxicity

527 It is estimated that we will have 80% or more power (alpha 0.01) to detect a true difference  
528 in grade  $\geq 2$  morbidity at 3 years if it occurs in less than 23.7% or more than 40.9% of the patients in  
529 group B. Assumptions: 700 patients are included in each group, the cumulative incidence of grade  
530  $\geq 2$  morbidity is 32% at 3 years with the standard treatment (based on the chemoradiation group in  
531 PORTEC-3), using Fisher's exact test to evaluate this null hypothesis. Alternatively, if the cumulative  
532 incidence of grade  $\geq 2$  morbidity is assumed to be 24% at 3 years with the standard treatment (based  
533 on the radiotherapy group in PORTEC-3), we will have at least 80% power to detect a true difference  
534 if it occurs in less than 16.5% or more than 32.4% of the patients in group B. The relation between  
535 the power and detectable difference is presented in power graph 2 of Supplemental figure 2.

536

537 Health-related quality of life

538 It is estimated that we will have 80% or more power (alpha 0.01) to detect a true difference  
539 in the EORTC QLQ-C30 scale score for fatigue at 3 years if the difference between group A and B is  
540 6.1 points (scale of 0 to 100) or more. Assumptions: 700 patients are included in each group, the  
541 standard deviation of the scale score for fatigue in the control population is 33.4 (based on the  
542 reference values for cervical cancer patients of the EORTC-QLQ) and the t-test is used to evaluate  
543 this null hypothesis. Alternatively, we have 80% or more power to detect a true difference in fatigue  
544 of 3.7 points or more if the SD in the control population is assumed to be equal to the Dutch  
545 reference population (SD=20, according to van de Poll et al. 2011).<sup>20</sup> The relation between the power  
546 and detectable difference is presented in power graph 3 of Supplemental figure 2.

547

548

549 Cost-utility

550 Disease-related health care costs will be estimated for Group A and B based on the collected  
 551 data on received adjuvant treatment, treatment for first recurrence and severe toxicity. Costs of  
 552 molecular profiling will only be included in group B. Quality-adjusted life years will be estimated with  
 553 individual follow-up times corrected for quality by linear interpolation of utility values deduced from  
 554 the EORTC QLQ-C30 questionnaires using the EORTC QLU-C10D.<sup>21,22</sup> Cost-effectiveness acceptability  
 555 curves will be used to plot the probability that tailored treatment is more cost-effective than  
 556 standard treatment as a function of willingness to pay. Sensitivity analysis will include alternative  
 557 methodology for utility value assessment by the EORTC 8D.<sup>23,24</sup>

558  
 559

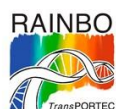

Power for hypothesis testing in the RAINBO overarching research program

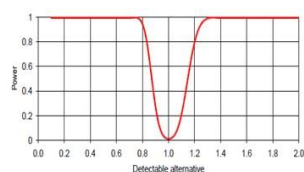

Power graph 1: Detectable alternative in hazard ratio for RFS at 3 years

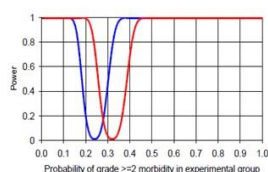Power graph 2: Detectable alternative for grade  $\geq 2$  morbidity at 3 years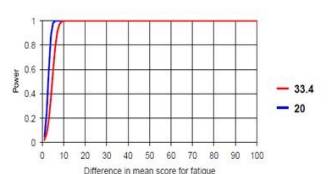

Power graph 3: Detectable difference in the scale score for fatigue

560 **Supplemental figure 2. Power graphs RAINBO overarching research program**

561 *Definition of abbreviation: RFS = recurrence-free survival.*

562

563 **5. Statistical methods**

564

565 *The p53abn-RED trial*

566 The primary endpoint, 3-year RFS, will be estimated according to Kaplan-Meier's method and  
567 compared between the two treatment groups using a Cox' proportional hazards model, with  
568 adjustment for randomization stratification factors. Secondary endpoints will be analyzed using  
569 competing risk models except for OS, which will be analyzed using the same methodology as RFS.

570

571 *The MMRd-GREEN trial*

572 The primary endpoint, 3-year RFS will be assessed according to Kaplan-Meier's methodology  
573 and compared between groups using a log-rank test when a median follow-up of three years has  
574 accrued. Other time-to-event analysis, including toxicity will be performed using similar methods.  
575 Health-related quality of life of patients will be analysed using linear mixed models and generalized  
576 estimating equations. Cross-sectional analysis of QoL will be performed at 6 months, 12 months, and  
577 36 months using linear regression for scale scores and logistic regression for item scores after  
578 dichotomization.

579

580 *The NSMP-ORANGE trial*

581 The primary endpoint will be described using Kaplan-Meier's method and analyzed using a  
582 Cox' proportional hazards model. The interpretation of non-inferiority will be based on the 95%  
583 confidence interval. Similar methods will be used for other time-to-event endpoints. Toxicity will be  
584 described using proportions and exact 95% confidence intervals and compared between groups  
585 using  $\chi^2$ /Fisher's exact tests as appropriate. Quality of life outcomes will be analyzed using mixed  
586 models.

587

588 *The POLEmut-BLUE trial*

589 In the POLEmut-BLUE trial, the primary endpoint 3-year pelvic recurrence will be derived  
590 from a competing risk analysis with death due to any cause as competing event and censoring of  
591 alive patients without pelvic recurrence. If the upper 95% confidence limit is less than 5% it will be  
592 concluded that the risk of pelvic recurrence at 3 years with molecular-tailored de-escalated adjuvant  
593 treatment is acceptable. The same competing risk-based approach is also used to estimate isolated  
594 vaginal recurrence and distant metastasis rates at 3 years and associated 90% confidence intervals.  
595 Kaplan-Meier method will be used to estimate 3-year rates of recurrence-free, EC-specific, and  
596 overall survivals and associated 90% confidence interval. In all these analyses, only those who have

597 complied with the recommendation for no or de-escalated adjuvant treatment will be included.  
598 Patients' quality of life mean score for each subscale will be calculated at each time of assessment  
599 from all patients who are assessed and compared to that observed in PORTEC-2<sup>25</sup>, as a historical  
600 control by a 2-sided one-sample t-test.

601

602 *The overarching RAINBO research program*

603 In the overarching research program, the oncological, survival and toxicity outcomes will be  
604 analyzed according to Kaplan-Meier's methodology and compared using log-rank tests and  
605 multivariable Cox' proportional hazards models. Longitudinal analysis of toxicity and quality of life  
606 across the first 3 years after randomization will be done using linear mixed models and generalized  
607 estimating equations. Cross-sectional analysis will be performed at 2-3 months, 6, 12 and 36 months  
608 using linear and logistic regression. Disease-related health care costs will be estimated for Group A  
609 and B based on the collected data on received adjuvant treatment, treatment for first recurrence  
610 and severe toxicity. Costs of molecular profiling will only be included in group A. Quality-adjusted life  
611 years will be estimated with individual follow-up times corrected for quality by linear interpolation  
612 of utility values deduced from the EORTC QLQ-C30 questionnaires using the EORTC QLU-C10D<sup>21,22</sup>.  
613 Cost-effectiveness acceptability curves will be used to plot the probability that tailored treatment is  
614 more cost-effective than standard treatment as a function of willingness to pay.

615

616

617 **6. RAINBO Research Consortium**

618

619 The RAINBO Research Consortium decided to publish this paper as a group, without any  
 620 individual authorships. This is because of the ensemble of 4 clinical trials and an overarching and  
 621 translational research program are the result of the interaction between experts of different  
 622 disciplines; as opposed to the efforts of the individuals. Selecting a limited number of individuals for  
 623 an authorship would not do justice to the efforts of all contributors that qualify for an authorship.  
 624 Moreover, using individual authorships implies that only a handful of individuals will be assigned the  
 625 most valued (first, second and last) authorships, which is incompatible with the number of lead  
 626 investigators of the RAINBO program. The members of the RAINBO Research consortium on October  
 627 4<sup>th</sup> 2022 are:

628

629 **Steering group (alphabetical)**

630 Bosse T<sup>1</sup>, Creutzberg CL<sup>2</sup>, Crosbie EJ<sup>3</sup>, Han K<sup>4</sup>, Horeweg N<sup>2</sup>, Leary A<sup>5</sup>, Kroep JR<sup>6</sup>, McAlpine JN<sup>7</sup>, Powell  
 631 ME<sup>8</sup>

632

633 **Translational committee (alphabetical)**

634 Blanc-Durand F<sup>5</sup>, Bosse T<sup>1</sup>, de Bruyn M<sup>9</sup>, Church DN<sup>10,11</sup>, Horeweg N<sup>2</sup>, Koelzer VH<sup>12,13</sup>, Kommos S<sup>14</sup>,  
 635 Leary A<sup>5</sup>, McAlpine JN<sup>7</sup>, Singh N<sup>15</sup>

636

637 **Statistical committee (alphabetical)**

638 Bardet A<sup>16,17</sup>, Counsell N<sup>18</sup>, Horeweg N<sup>2</sup>, Putter H<sup>19</sup>, Tu D<sup>20</sup>

639

640 **Advisory committee (alphabetical)**

641 Edmondson R<sup>3</sup>, Gordon C<sup>21</sup>, Ledermann J<sup>22</sup>, Morice P<sup>23</sup>, MacKay H<sup>24</sup>, Nijman H<sup>9</sup>, Nout RA<sup>25</sup>, Smit  
 642 VTHBM<sup>1</sup>, White H<sup>26</sup>.

643

644 **Country champions (alphabetical)**

645 Alexandre J<sup>27,28</sup>, de Boer SM<sup>2</sup>, Boere I<sup>29</sup>, Cooper R<sup>30</sup>, Ethier JL<sup>31,32</sup>, Frenel JS<sup>33</sup>, McGrane J<sup>34</sup>, Taylor A<sup>35</sup>,  
 646 Welch S<sup>36</sup>, Westermann AM<sup>37</sup>

647

648 **Trial management (alphabetical)**

649 Dijkstra-van der Linden H<sup>38</sup>, Farrelly L<sup>18</sup>, Feeney A<sup>18</sup>, Kaya M<sup>2</sup>, Liu W<sup>20</sup>, Melis A<sup>38</sup>, Ngadjewa-Tchouatieu  
 650 F<sup>39</sup>, Parulekar W<sup>20</sup>, Verhoeven-Adema K<sup>38</sup>

651

652 **Writing committee**

653 Horeweg N<sup>2</sup>, Powell ME<sup>8</sup>, Han K<sup>4</sup>, Kroep JR<sup>6</sup>, Blanc-Durand F<sup>5</sup>, Welch S<sup>34</sup>, Bardet A<sup>16,17</sup>, Counsell N<sup>18</sup>,  
 654 Putter H<sup>19</sup>, Tu D<sup>20</sup>, Singh N<sup>15</sup>, Church DN<sup>10,11</sup>, Kommos S<sup>14</sup>, de Bruyn M<sup>9</sup>, Nijman H<sup>9</sup>, Creutzberg CL<sup>2</sup>,  
 655 McAlpine JN<sup>7</sup>, Bosse T<sup>1</sup>, Crosbie EJ<sup>3</sup>, MacKay H<sup>23</sup>, Leary A<sup>5</sup>

656

657

658 **Affiliations of the participants of the RAINBO research consortium**

- 659 1. Department of Pathology, Leiden University Medical Center, the Netherlands
- 660 2. Department of Radiation Oncology, Leiden University Medical Center, the Netherlands
- 661 3. Department of Obstetrics and Gynaecology, Manchester Academic Health Science Centre, St Mary's  
 662 Hospital, Manchester, United Kingdom
- 663 4. Department of Radiation Oncology, Princess Margaret Cancer Centre, University Health Network,  
 664 University of Toronto, Radiation Oncology, Toronto, Canada
- 665 5. Department of Medical Oncology, Gustave Roussy Cancer Center, Université Paris Saclay, Cancer  
 666 Medicine and Gynecological Tumor Translational Research Lab, Villejuif, France
- 667 6. Department of Medical Oncology, Leiden University Medical Center, the Netherlands
- 668 7. Department of Obstetrics and Gynecology, University of British Columbia, Vancouver, Canada

- 669 8. Department of Clinical Oncology, Barts Health NHS Trust, London, United Kingdom  
670 9. Department of Gyneacology, University Medical Center Groningen, Groningen University, Groningen, the  
671 Netherlands  
672 10. Wellcome Centre for Human Genetics, Nuffield Department of Medicine, University of Oxford, Oxford,  
673 the United Kingdom  
674 11. Oxford NIHR Comprehensive Biomedical Research Centre, Oxford, United Kingdom  
675 12. Department of Pathology and Molecular Pathology, University Hospital Zürich, University of Zürich,  
676 Zürich, Switzerland  
677 13. Department of Oncology and Nuffield Department of Medicine, University of Oxford, Oxford, United  
678 Kingdom  
679 14. Department of Women's Health, University of Tübingen, Tübingen, Germany  
680 15. Department of Cellular Pathology, Barths Health NHS Trust, London, the United Kingdom  
681 16. Bureau of Biostatistics and Epidemiology, University Paris-Saclay, Gustave-Roussy, Villejuif, France  
682 17. Oncostat U1018, Inserm, University Paris-Saclay, Ligue Contre le Cancer, Villejuif, France  
683 18. Cancer Research UK and University College London Cancer Trials Centre, University College London,  
684 London, United Kingdom.  
685 19. Department of Biomedical Data Sciences, Leiden University Medical Center, Leiden  
686 20. Canadian Cancer Trials Group, Queen's University, Kingston, Ontario, Canada  
687 21. Patient Representative, Canadian Cancer Clinical Trials Group, Queen's University, Kingston, Ontario,  
688 Canada  
689 22. Cancer Research UK and UCL Cancer Trials Centre, UCL Cancer Institute and UCL Hospitals, London, the  
690 United Kingdom  
691 23. Department of Gynaecologic Surgery, Gustave Roussy Cancer Center, Université Paris Saclay, Villejuif,  
692 France  
693 24. Department of Medical Oncology, Odette Cancer Center, Sunnybrook Health Sciences Centre, Toronto,  
694 Ontario, Canada  
695 25. Department of Radiotherapy, Erasmus MC Cancer Institute, Rotterdam, the Netherlands  
696 26. Patient Representative, Peaches Patient Voices, Manchester, United Kingdom  
697 27. Centre de Recherche des Cordeliers, Equipe labélisée Ligue Contre le Cancer, Sorbonne Université,  
698 Université de Paris, INSERM, Paris, France.  
699 28. Department of Medical Oncology, Hopital Cochin, Institut du Cancer Paris, Paris, France.  
700 29. Department of Medical Oncology, Erasmus MC Cancer Institute, Rotterdam, the Netherlands  
701 30. Department of Clinical Oncology, Leeds Teaching Hospitals NHS Trust, Leeds, UK  
702 31. Division of Cancer Care and Epidemiology, Queen's Cancer Research Institute, Kingston, Ontario, Canada  
703 32. Department of Oncology, Queen's University, Kingston, Ontario, Canada.  
704 33. Department of Medical Oncology, Institut de Cancerologie de l'Ouest-Centre Rene Gauducheau, Saint-  
705 Herblain, France  
706 34. Sunrise Oncology Centre, Royal Cornwall Hospital, Truro, the United Kingdom.  
707 35. Department of Gynaecological Oncology, The Royal Marsden NHS Foundation Trust, London, the United  
708 Kingdom  
709 36. Division of Medical Oncology, Western University, London, Ontario, Canada  
710 37. Department of Oncology, Amsterdam University Medical Centers, University of Amsterdam, Amsterdam,  
711 the Netherlands  
712 38. Comprehensive Cancer Center the Netherlands (IKNL), Leiden, the Netherlands  
713 39. Clinical Research Department, Institute Gustave Roussy, Chevilly-Larue, France  
714



715 **7. Supplementary references**

- 716 1. Small W, Jr., Bosch WR, Harkenrider MM, et al. NRG Oncology/RTOG Consensus Guidelines for  
717 Delineation of Clinical Target Volume for Intensity Modulated Pelvic Radiation Therapy in  
718 Postoperative Treatment of Endometrial and Cervical Cancer: An Update. *Int J Radiat Oncol Biol Phys*  
719 2021;109(2):413-24. doi: 10.1016/j.ijrobp.2020.08.061 [published Online First: 2020/09/10]  
720 2. EMBRACE\_study\_group. EMBRACE-II study protocol:  
721 <https://www.embracestudy.dk/UserUpload/PublicDocuments/EMBRACE%20II%20Protocol.pdf>.  
722 3. Hodapp N. [The ICRU Report 83: prescribing, recording and reporting photon-beam intensity-modulated  
723 radiation therapy (IMRT)]. *Strahlenther Onkol* 2012;188(1):97-9. doi: 10.1007/s00066-011-0015-x  
724 [published Online First: 2012/01/12]  
725 4. Creutzberg CL, van Putten WL, Koper PC, et al. Surgery and postoperative radiotherapy versus surgery alone  
726 for patients with stage-1 endometrial carcinoma: multicentre randomised trial. PORTEC Study Group.  
727 Post Operative Radiation Therapy in Endometrial Carcinoma. *Lancet* 2000;355(9213):1404-11. doi:  
728 10.1016/s0140-6736(00)02139-5 [published Online First: 2000/05/03]  
729 5. Nout RA, Smit VT, Putter H, et al. Vaginal brachytherapy versus pelvic external beam radiotherapy for  
730 patients with endometrial cancer of high-intermediate risk (PORTEC-2): an open-label, non-inferiority,  
731 randomised trial. *Lancet* 2010;375(9717):816-23. doi: 10.1016/S0140-6736(09)62163-2 [published  
732 Online First: 2010/03/09]  
733 6. de Boer SM, Powell ME, Mileschkin L, et al. Adjuvant chemoradiotherapy versus radiotherapy alone in  
734 women with high-risk endometrial cancer (PORTEC-3): patterns of recurrence and post-hoc survival  
735 analysis of a randomised phase 3 trial. *Lancet Oncol* 2019;20(9):1273-85. doi: 10.1016/S1470-  
736 2045(19)30395-X [published Online First: 2019/07/28]  
737 7. Potter R, Tanderup K, Schmid MP, et al. MRI-guided adaptive brachytherapy in locally advanced cervical  
738 cancer (EMBRACE-I): a multicentre prospective cohort study. *Lancet Oncol* 2021;22(4):538-47. doi:  
739 10.1016/S1470-2045(20)30753-1 [published Online First: 2021/04/02]  
740 8. Peters EEM, Leon-Castillo A, Smit V, et al. Defining Substantial Lymphovascular Space Invasion in  
741 Endometrial Cancer. *Int J Gynecol Pathol* 2022;41(3):220-26. doi: 10.1097/PGP.0000000000000806  
742 [published Online First: 2021/07/16]  
743 9. WHO\_Classification\_of\_Tumours\_Editorial\_Board. Female genital tumors. WHO Classification of Tumours,  
744 5th Edition. 2020;4:252-66.  
745 10. Leon-Castillo A, Britton H, McConechy MK, et al. Interpretation of somatic POLE mutations in endometrial  
746 carcinoma. *J Pathol* 2020;250(3):323-35. doi: 10.1002/path.5372 [published Online First: 2019/12/13]  
747 11. Concin N, Matias-Guiu X, Vergote I, et al. ESGO/ESTRO/ESP guidelines for the management of patients  
748 with endometrial carcinoma. *Int J Gynecol Cancer* 2021;31(1):12-39. doi: 10.1136/ijgc-2020-002230  
749 [published Online First: 2021/01/06]  
750 12. Bouaoun L, Sonkin D, Ardin M, et al. TP53 Variations in Human Cancers: New Lessons from the IARC  
751 TP53 Database and Genomics Data. *Hum Mutat* 2016;37(9):865-76. doi: 10.1002/humu.23035  
752 [published Online First: 2016/06/23]  
753 13. Landrum MJ, Lee JM, Riley GR, et al. ClinVar: public archive of relationships among sequence variation  
754 and human phenotype. *Nucleic Acids Res* 2014;42(Database issue):D980-5. doi: 10.1093/nar/gkt1113  
755 [published Online First: 2013/11/16]  
756 14. Singh N, Piskorz AM, Bosse T, et al. p53 immunohistochemistry is an accurate surrogate for TP53  
757 mutational analysis in endometrial carcinoma biopsies. *J Pathol* 2020;250(3):336-45. doi:  
758 10.1002/path.5375 [published Online First: 2019/12/13]  
759 15. Vermij L, Leon-Castillo A, Singh N, et al. p53 immunohistochemistry in endometrial cancer: clinical and  
760 molecular correlates in the PORTEC-3 trial. *Mod Pathol* 2022 doi: 10.1038/s41379-022-01102-x  
761 [published Online First: 2022/06/26]  
762 16. Kobel M, Piskorz AM, Lee S, et al. Optimized p53 immunohistochemistry is an accurate predictor of TP53  
763 mutation in ovarian carcinoma. *J Pathol Clin Res* 2016;2(4):247-58. doi: 10.1002/cjp.2.53 [published  
764 Online First: 2016/11/15]  
765 17. Leon-Castillo A, de Boer SM, Powell ME, et al. Molecular Classification of the PORTEC-3 Trial for High-  
766 Risk Endometrial Cancer: Impact on Prognosis and Benefit From Adjuvant Therapy. *J Clin Oncol*  
767 2020;38(29):3388-97. doi: 10.1200/JCO.20.00549 [published Online First: 2020/08/05]  
768 18. Post CCB, Mens JWM, Haverkort MAD, et al. Patients' and clinicians' preferences in adjuvant treatment for  
769 high-risk endometrial cancer: Implications for shared decision making. *Gynecol Oncol*  
770 2021;161(3):727-33. doi: 10.1016/j.ygyno.2021.03.004 [published Online First: 2021/03/14]  
771 19. Jitlal M, Khan I, Lee SM, et al. Stopping clinical trials early for futility: retrospective analysis of several  
772 randomised clinical studies. *Br J Cancer* 2012;107(6):910-7. doi: 10.1038/bjc.2012.344 [published  
773 Online First: 2012/08/11]

- 774 20. van de Poll-Franse LV, Mols F, Gundy CM, et al. Normative data for the EORTC QLQ-C30 and EORTC-  
775 sexuality items in the general Dutch population. *Eur J Cancer* 2011;47(5):667-75. doi:  
776 10.1016/j.ejca.2010.11.004 [published Online First: 2010/12/08]
- 777 21. King MT, Costa DS, Aaronson NK, et al. QLU-C10D: a health state classification system for a multi-  
778 attribute utility measure based on the EORTC QLQ-C30. *Qual Life Res* 2016;25(3):625-36. doi:  
779 10.1007/s11136-015-1217-y [published Online First: 2016/01/23]
- 780 22. Kemmler G, Gamper E, Nerich V, et al. German value sets for the EORTC QLU-C10D, a cancer-specific  
781 utility instrument based on the EORTC QLQ-C30. *Qual Life Res* 2019;28(12):3197-211. doi:  
782 10.1007/s11136-019-02283-w [published Online First: 2019/09/06]
- 783 23. Lorgelly PK, Doble B, Rowen D, et al. Condition-specific or generic preference-based measures in  
784 oncology? A comparison of the EORTC-8D and the EQ-5D-3L. *Qual Life Res* 2017;26(5):1163-76.  
785 doi: 10.1007/s11136-016-1443-y [published Online First: 2016/11/11]
- 786 24. van Dongen-Leunis A, Redekop WK, Uyl-de Groot CA. Which Questionnaire Should Be Used to Measure  
787 Quality-of-Life Utilities in Patients with Acute Leukemia? An Evaluation of the Validity and  
788 Interpretability of the EQ-5D-5L and Preference-Based Questionnaires Derived from the EORTC  
789 QLQ-C30. *Value Health* 2016;19(6):834-43. doi: 10.1016/j.jval.2016.05.008 [published Online First:  
790 2016/10/08]
- 791 25. Nout RA, Putter H, Jurgensliemk-Schulz IM, et al. Five-year quality of life of endometrial cancer patients  
792 treated in the randomised Post Operative Radiation Therapy in Endometrial Cancer (PORTEC-2) trial  
793 and comparison with norm data. *Eur J Cancer* 2012;48(11):1638-48. doi: 10.1016/j.ejca.2011.11.014  
794 [published Online First: 2011/12/20]
- 795
